# Supplementary material for: 3D hierarchical rose-like Ni2P@rGO assembled from interconnected nanoflakes as anode for lithium ion batteries
Source: Royal Society of Chemistry journal article supplement (doi:10.1039/c9ra10729k), 2020-01-01
Supplement: c9ra10729k1.pdf [file c9ra10729k1.pdf]

## Supporting Information

### **3D Hierarchical Rose-like Ni<sub>2</sub>P@rGO Assembled from Interconnected Nanoflakes as Anode for Lithium Ion Batteries**

Gan Cai, Zhenguo Wu, Tao Luo, Yanjun Zhong\*, Xiaodong Guo, Zhiye Zhang, Xinlong Wang, Benhe Zhong

*School of Chemical Engineering, Engineering Research Center of Comprehensive Utilization and Clean Processing of Phosphorus Resources of Ministry of Education, Sichuan University, Chengdu 610065, P. R. China*

Corresponding Author:

E-mail address:

yjzhong@scu.edu.cn (Yanjun Zhong), Tel. /fax: +86-28-85405235

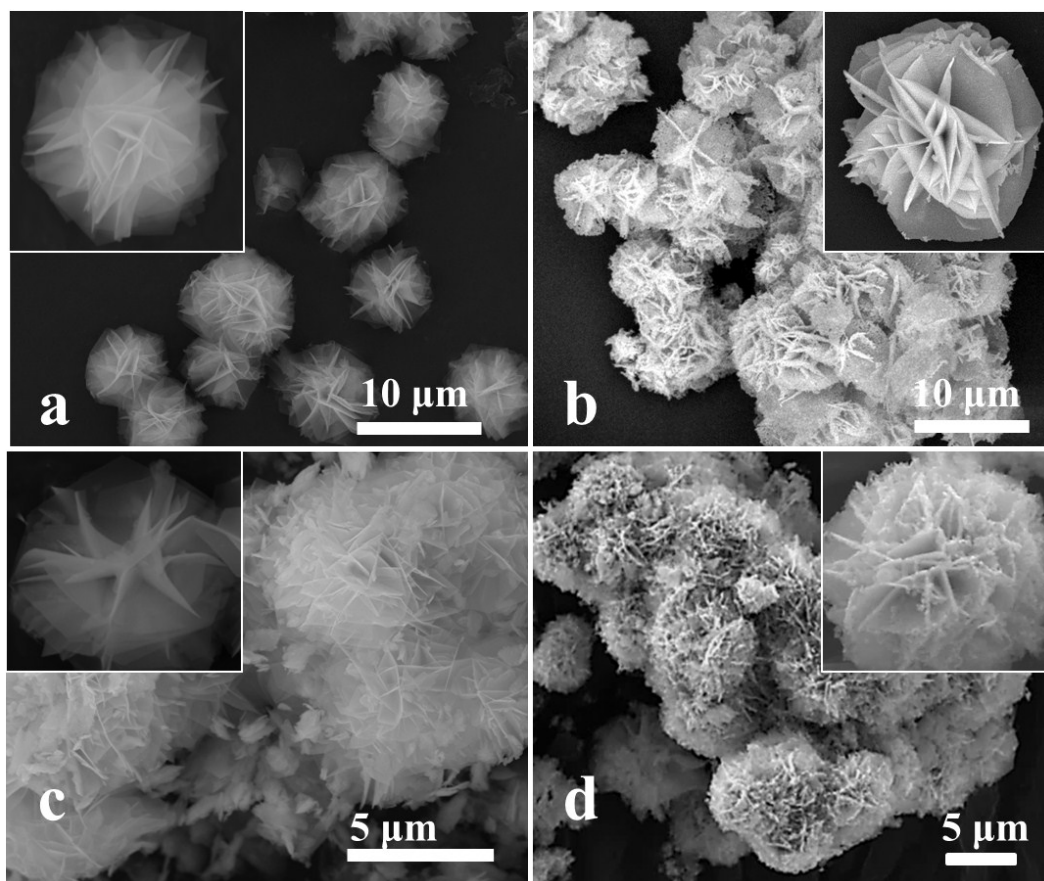

**Fig. S1.** SEM images of the precursor and product for  $\text{Ni}_2\text{P}$  and  $\text{Ni}_2\text{P}@G$  samples. (a)  $\text{Ni}(\text{OH})_2$  precursor of  $\text{Ni}_2\text{P}$  sample, (b)  $\text{Ni}_2\text{P}$  sample, (c)  $\text{Ni}(\text{OH})_2@G$  precursor of  $\text{Ni}_2\text{P}@G$  sample, and (d)  $\text{Ni}_2\text{P}@G$  sample.

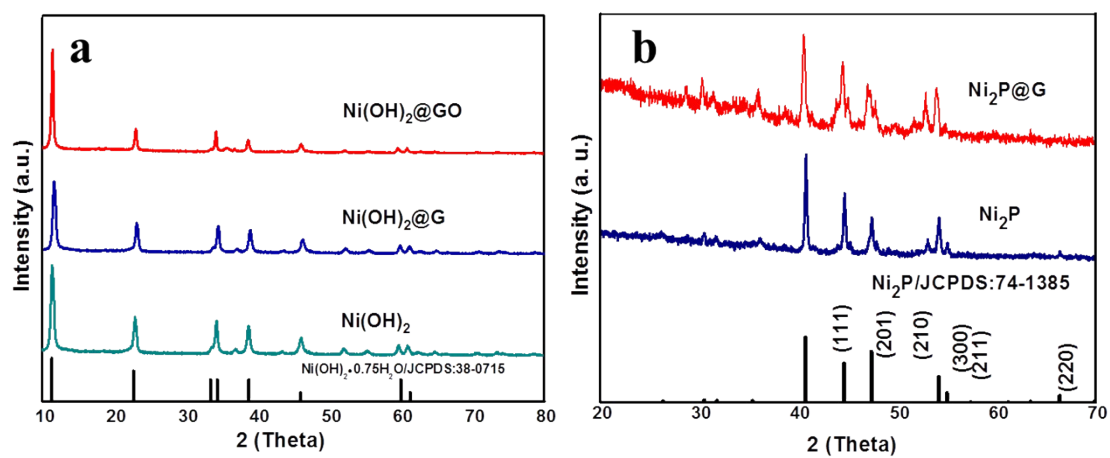

**Fig. S2.** XRD patterns of the (a)  $\text{Ni}(\text{OH})_2$  precursor,  $\text{Ni}(\text{OH})_2@G$  precursor and  $\text{Ni}(\text{OH})_2@GO$  precursor, and (b)  $\text{Ni}_2\text{P}$  and  $\text{Ni}_2\text{P}@G$  samples.

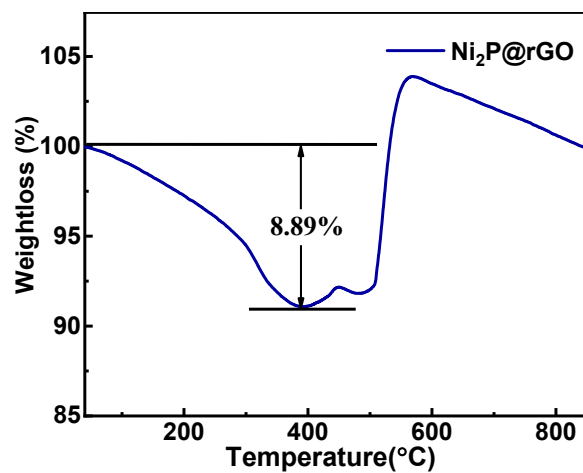

Fig. S3 TGA curve of Ni<sub>2</sub>P@rGO

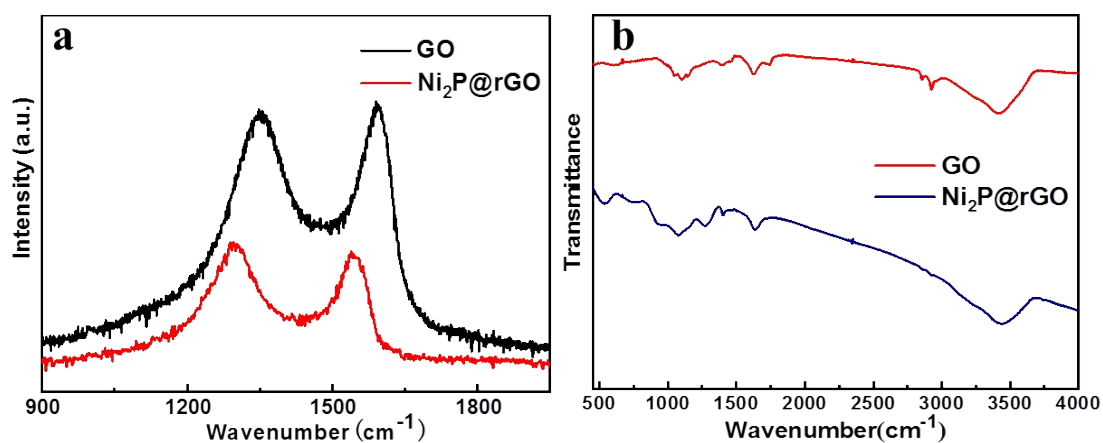

Fig. S4 (a) Raman spectra of GO and Ni<sub>2</sub>P@rGO (b) FTIR spectra of GO and Ni<sub>2</sub>P@rGO

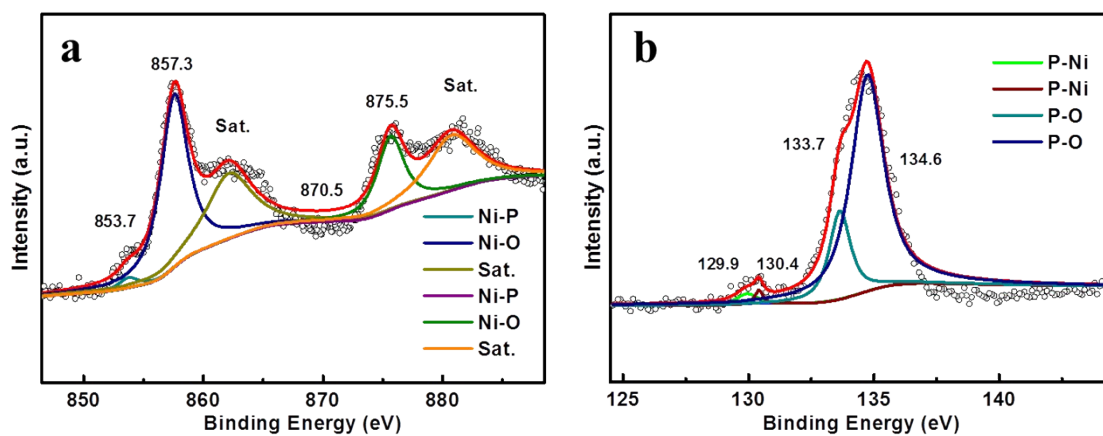

**Fig. S5** XPS spectra of as-prepared Ni<sub>2</sub>P sample: (a) Ni 2p and (b) P 2p.

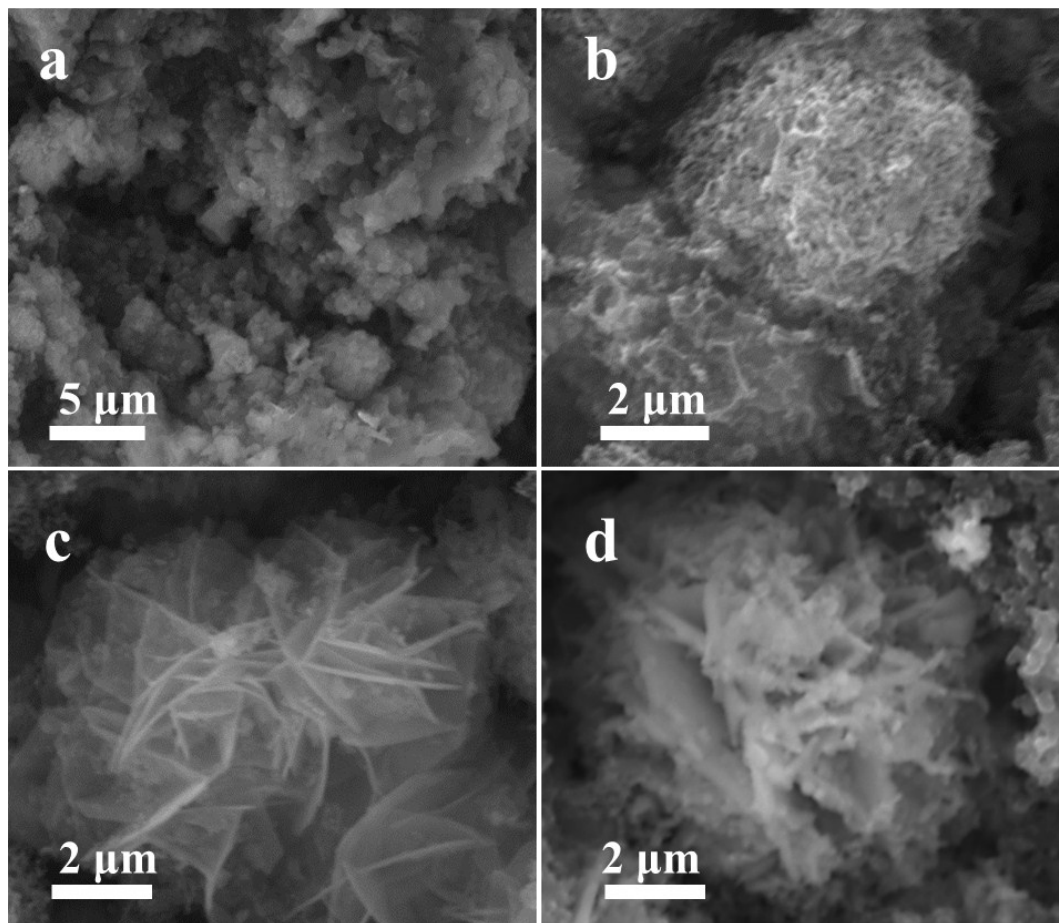

**Fig. S6** SEM images of electrode material (a) Ni<sub>2</sub>P, (b) Ni<sub>2</sub>P@G and (c) Ni<sub>2</sub>P@rGO after 100 cycles at 100 mA g<sup>-1</sup> of, and (d) Ni<sub>2</sub>P@rGO after 300 cycles at 300 mA g<sup>-1</sup>
